# Supplementary material for: Precipitation bias correction of very high resolution regional climate models
Source: Copernicus journal article supplement (doi:10.5194/hess-17-4379-2013), 2013-11-06
Supplement: Supplementary file 1 [file hess-17-4379-2013-supplement.pdf]

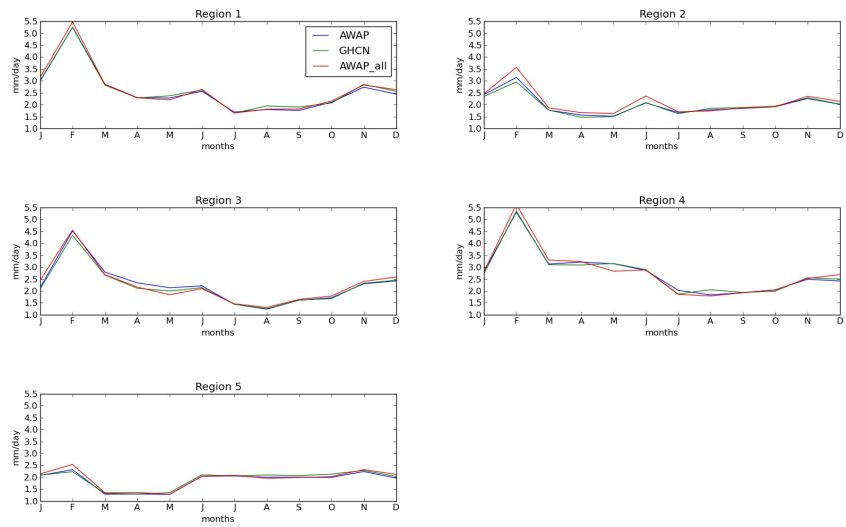

Figure 1: Monthly climatologies using all AWAP grid points within each region (red), all GHCN stations within each region (green), and the nearest AWAP grid point to each station within each region (blue)

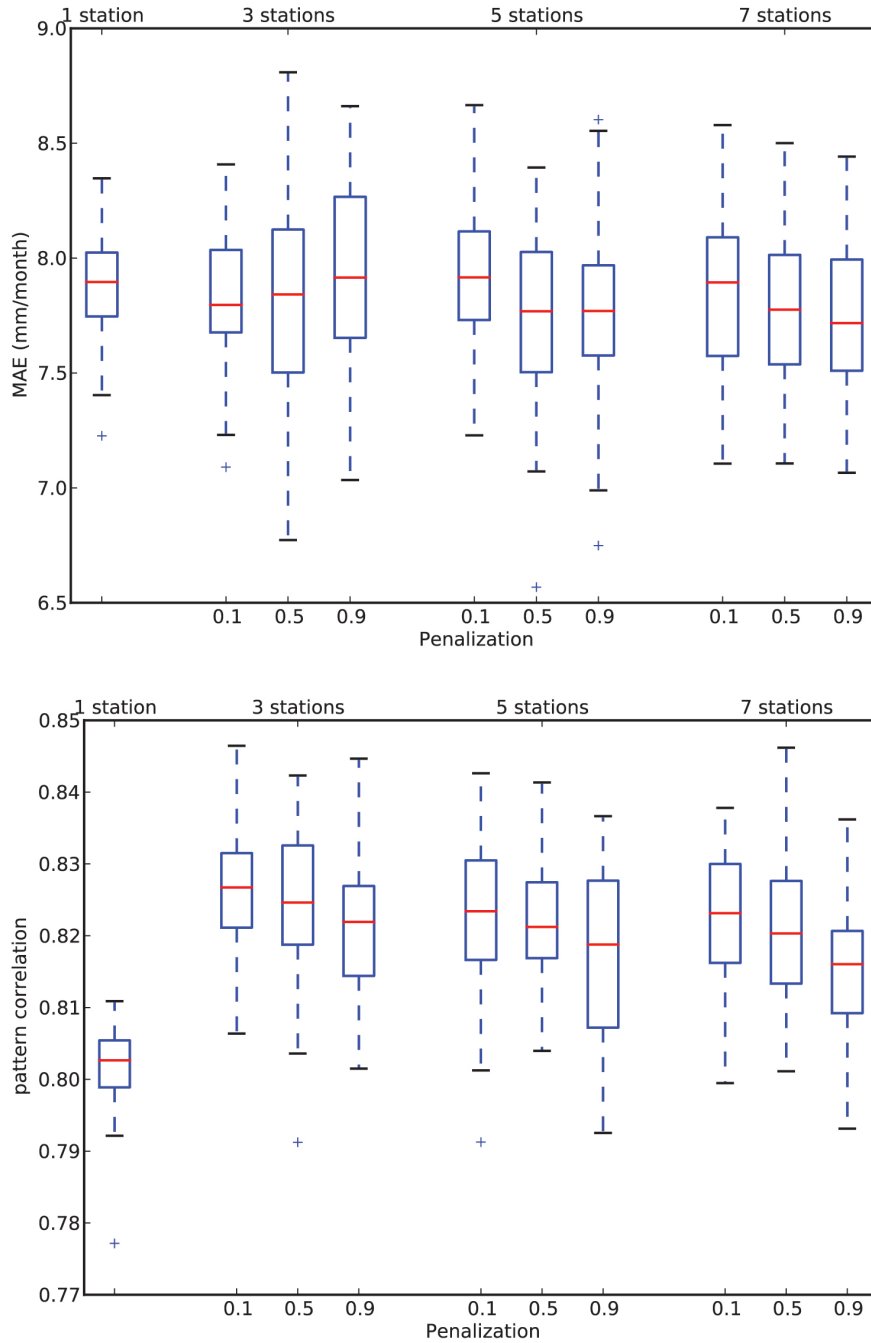

Figure 2: Top: Seasonal Mean Absolute Error between corrected WRF outputs and GHCN. The boxplot encompass 50 perturbed realisations removing a random 10% of the stations each time for various bias correction parameter values. Bottom: as top but for pattern correlation and using AWAP as reference
